# Supplementary material for: Nitrogen-Doped Carbon Dot-Based Dual-Emission Ratiometric Probe for Smartphone-Assisted Ultrasensitive Detection of Moxifloxacin
Source: Research Square preprint supplement (doi:10.21203/rs.3.rs-7576753/v1), 2025-09-24
Supplement: Supplementary file 1 [file 115b6456cb185c6589c8ea1f.docx]

Electronic Supplementary Information

**Nitrogen-Doped Carbon Dot-Based Dual-Emission Ratiometric Probe for Smartphone-Assisted Ultrasensitive Detection of Moxifloxacin**

Sewara J. Mohammed *a, Azad H. Alshatteri *b,Sivan A. Abubakr c

1. Department of Chemistry, College of Science, University of Sulaimani, 46001 Sulaymaniyah, Kurdistan Regional Government, Iraq.
2. Department of Chemistry, College of Education, University of Garmian, 46021 Kalar, Sulaymaniyah, Kurdistan Regional Government, Iraq.
3. Department of Chemistry, College of Science, Charmo University, 46023 Chamchamal, Sulaymaniyah, Kurdistan Regional Government, Iraq.

*Corresponding author. E-mail: [Sewara.mohammed@univsul.edu.iq](mailto:Sewara.mohammed@univsul.edu.iq): [azadalshatteri@garmian.edu.krd](mailto:azadalshatteri@garmian.edu.krd)

1. **Fig. S1** FT-IR spectra of **(a)** 4AA, **(b)** CA, and **(c)** N-CDs.
2. **Fig. S2** 1H-NMR spectra of **(a)** 4AA, and **(b)** N-CDs.
3. **Fig. S3** 13C-NMR spectra of **(a)** 4AA, and **(b)** N-CDs.
4. **Fig. S4** **(a)** Low-magnification and (b) higher-magnification TEM images of the synthesized N-CDs. The inset in **(b)** shows the particle size distribution histogram.

**Fig. S1 FT-IR spectra of (a) 4AA, (b) CA, and (c) N-CDs**


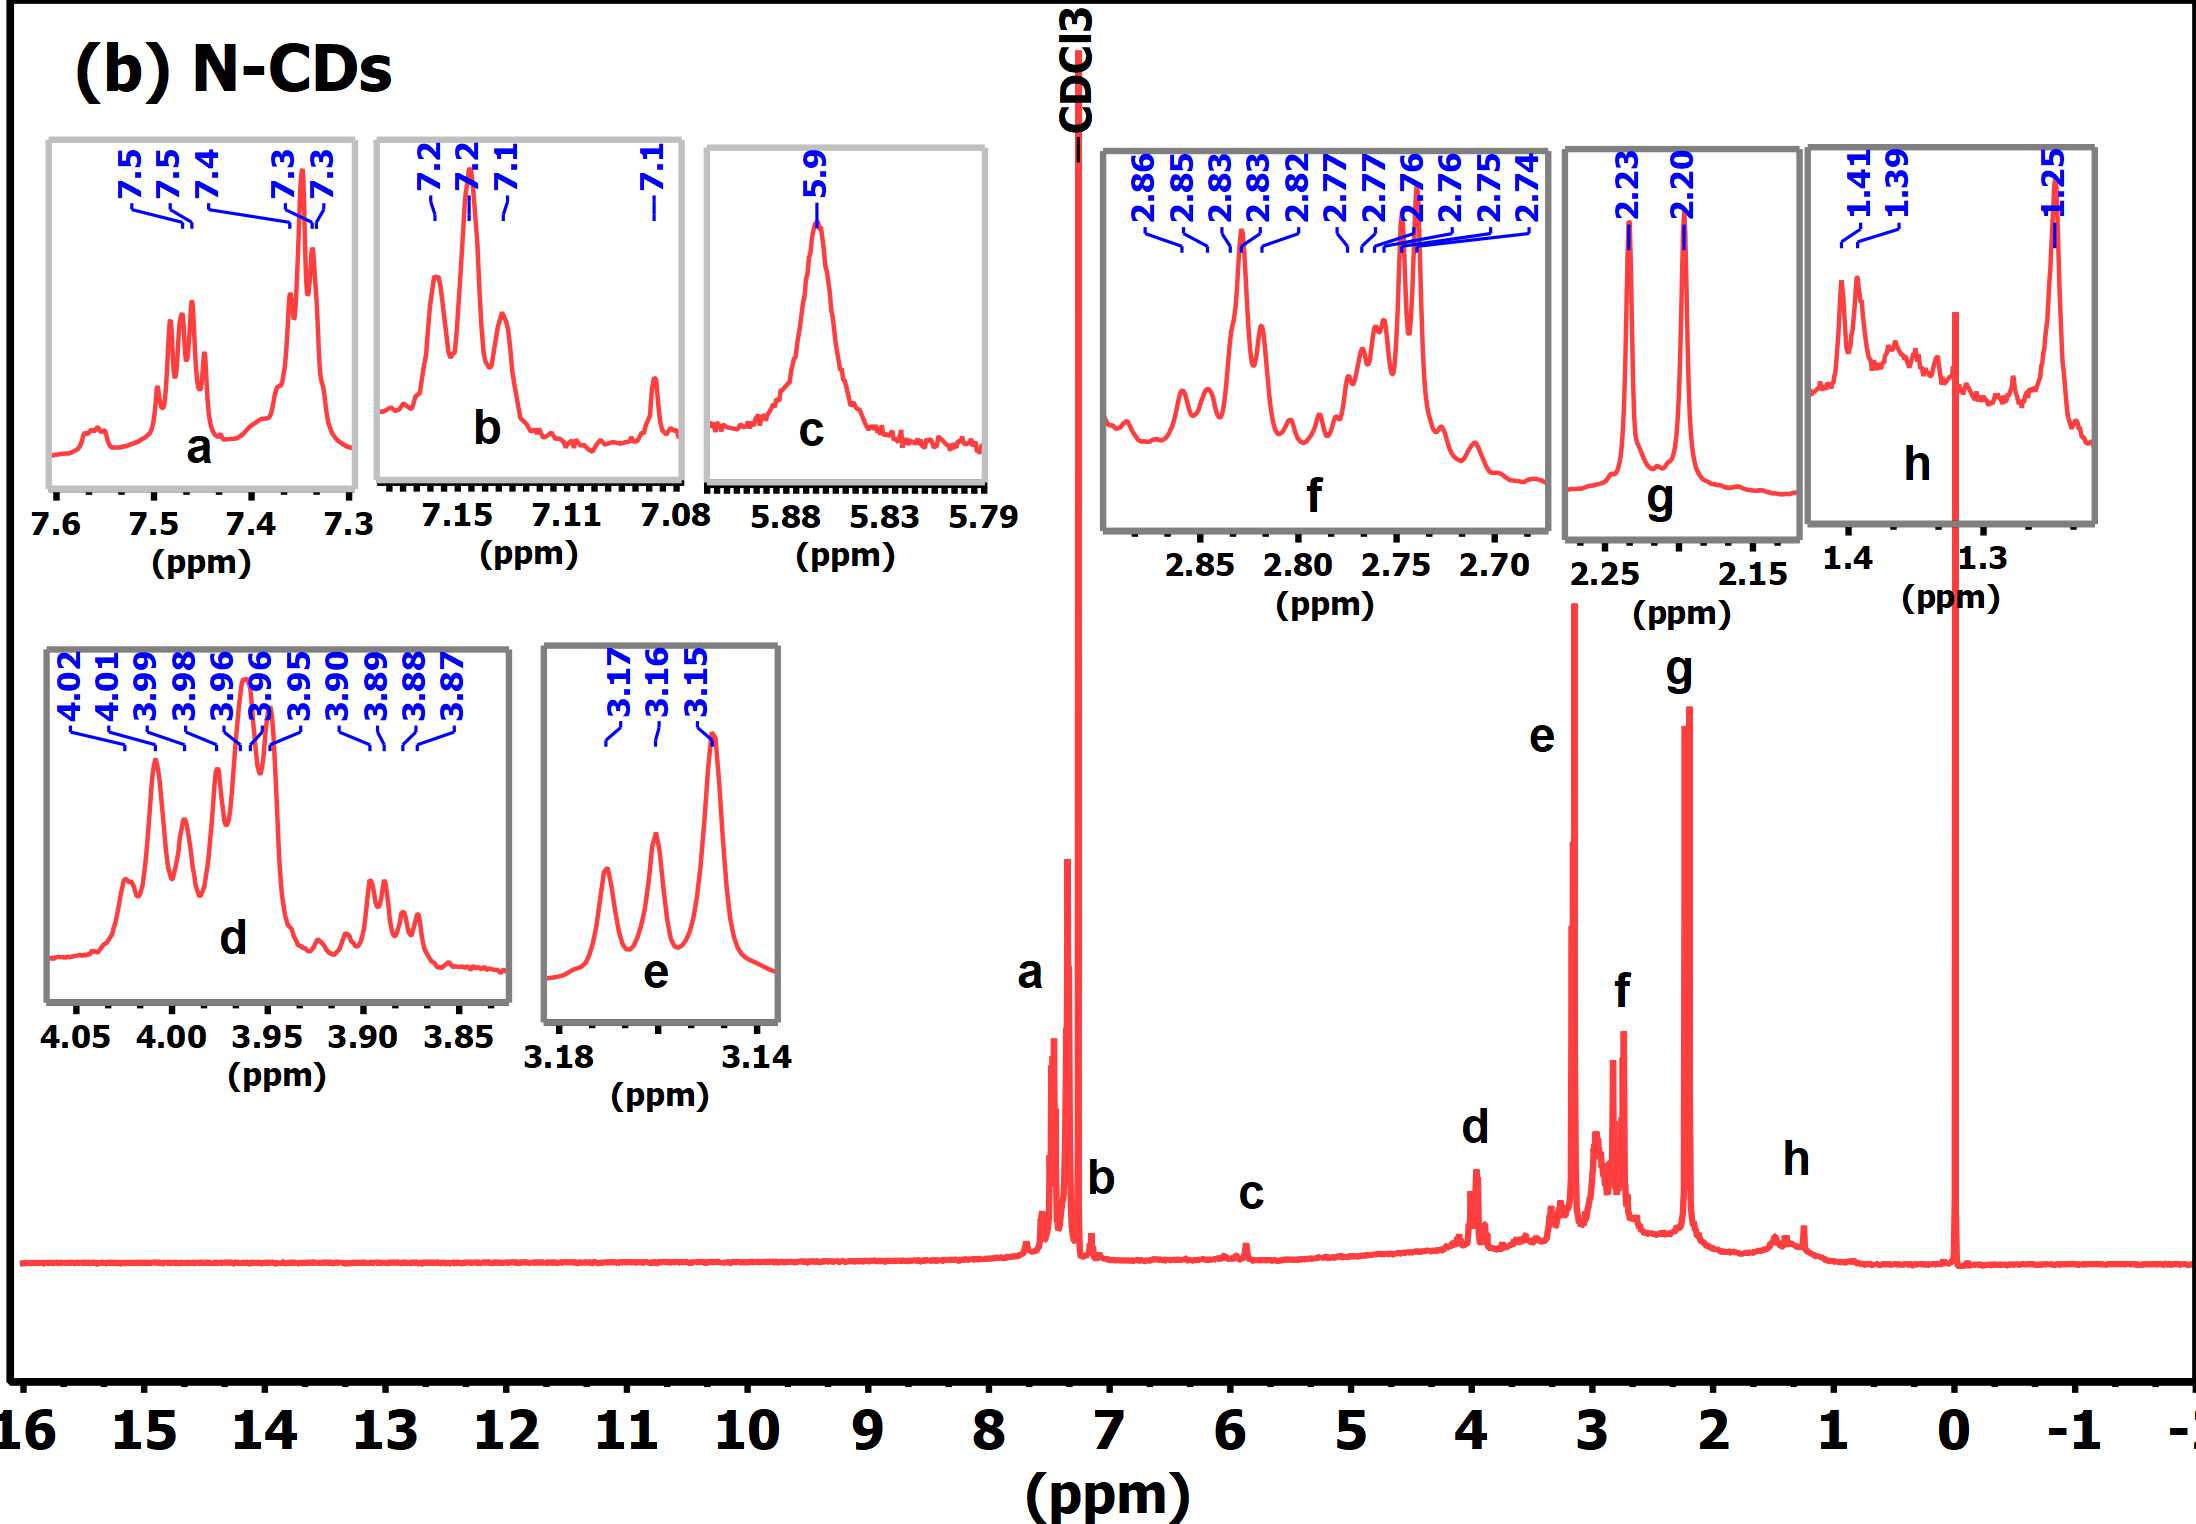


**Fig. S2 1H-NMR spectra of (a) 4AA, and (b) N-CDs**

**Fig. S3 13C-NMR spectra of (a) 4AA, and (b) N-CDs**


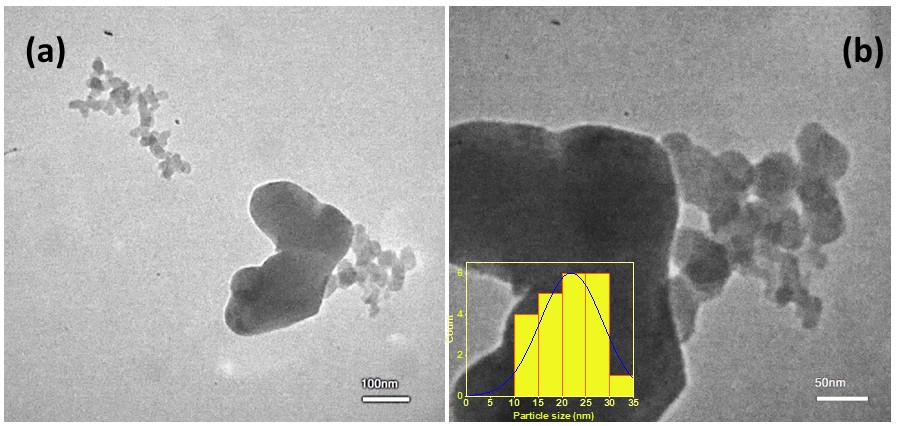


**Fig. S4 (a) Low-magnification and (b) higher-magnification TEM images of the synthesized N-CDs. The inset in (b) shows the particle size distribution histogram.**
